# Supplementary material for: Geochemical and Microbiological Evidence for Microbial Methane Production in Deep Aquifers of the Cretaceous Accretionary Prism
Source: PubMed Central journal article supplement (PMC6031385; doi:10.1264/jsme2.me17199), 2018-06-13
Supplement: 33_205_s1.pdf [file 33_205_s1.pdf]

**Table S1.** Location, structure, and deep aquifers of wells for sampling.

| Site name                | Site code | Latitude     | Longitude     | Well depth (Strainer depth) (m) | Formation of deep aquifer      | Water pumping method |
|--------------------------|-----------|--------------|---------------|---------------------------------|--------------------------------|----------------------|
| Yuinchi Hotel Nanjo      | YHN       | 26°09'53.6"N | 127°46'05.1"E | 2,119 (1,510-2,119)             | Nago Group and Shimajiri Group | WP                   |
| Loisir Hotel             | LSH       | 26°12'50.6"N | 127°39'54.3"E | 800 (no data)                   | Nago Group                     | NWP                  |
| Xystus Urasoe            | XTU       | 26°14'04.7"N | 127°42'30.5"E | 1,560 (1,274-1,527)             | Nago Group                     | NWP                  |
| Natural hot spring Aroma | ARM       | 26°17'19.4"N | 127°44'45.8"E | 1,300 (1,054-1,252)             | Nago Group                     | NWP                  |

Abbreviation: WP, water pump; NWP, natural water pressure.

**Table S2.** The chemical characteristics of groundwater, normal seawater, and ancient seawater.

| Site code                     | Na <sup>+</sup><br>(mg L <sup>-1</sup> ) | Ca <sup>2+</sup><br>(mg L <sup>-1</sup> ) | Mg <sup>2+</sup><br>(mg L <sup>-1</sup> ) | K <sup>+</sup><br>(mg L <sup>-1</sup> ) | NH <sub>4</sub> <sup>+</sup><br>(mg L <sup>-1</sup> ) | Cl <sup>-</sup><br>(mg L <sup>-1</sup> ) | Br <sup>-</sup><br>(mg L <sup>-1</sup> ) | I <sup>-</sup><br>(mg L <sup>-1</sup> ) | F <sup>-</sup><br>(mg L <sup>-1</sup> ) | PO <sub>4</sub> <sup>3-</sup><br>(mg L <sup>-1</sup> ) | NO <sub>3</sub> <sup>-</sup><br>(mg L <sup>-1</sup> ) | SO <sub>4</sub> <sup>2-</sup><br>(mg L <sup>-1</sup> ) | S <sup>2-</sup><br>(mg L <sup>-1</sup> ) | HCO <sub>3</sub> <sup>-</sup><br>(mg L <sup>-1</sup> ) | Acetate<br>(mg L <sup>-1</sup> ) | Formate<br>(mg L <sup>-1</sup> ) | DOC<br>(mg L <sup>-1</sup> ) |
|-------------------------------|------------------------------------------|-------------------------------------------|-------------------------------------------|-----------------------------------------|-------------------------------------------------------|------------------------------------------|------------------------------------------|-----------------------------------------|-----------------------------------------|--------------------------------------------------------|-------------------------------------------------------|--------------------------------------------------------|------------------------------------------|--------------------------------------------------------|----------------------------------|----------------------------------|------------------------------|
| YHN                           | 10,000                                   | 540                                       | 170                                       | 59                                      | 46                                                    | 16,000                                   | 96                                       | 86                                      | <0.5                                    | <0.5                                                   | <1.0                                                  | 9.3                                                    | <0.5                                     | 200                                                    | <5.0                             | <5.0                             | 17                           |
| LSH                           | 7,000                                    | 460                                       | 54                                        | 78                                      | 18                                                    | 11,000                                   | 58                                       | 33                                      | 1.8                                     | <0.5                                                   | <1.0                                                  | <0.1                                                   | <0.5                                     | 120                                                    | <5.0                             | <5.0                             | 0.5                          |
| XTU                           | 6,400                                    | 480                                       | 64                                        | 66                                      | 18                                                    | 10,000                                   | 56                                       | 32                                      | 2.1                                     | <0.5                                                   | <1.0                                                  | <0.1                                                   | <0.5                                     | 100                                                    | <5.0                             | <5.0                             | 0.4                          |
| ARM                           | 1,800                                    | 32                                        | 9.6                                       | 17                                      | 6.4                                                   | 2,400                                    | 13                                       | 9.0                                     | 2.8                                     | <0.5                                                   | <1.0                                                  | 0.1                                                    | <0.5                                     | 450                                                    | <5.0                             | <5.0                             | <0.3                         |
| Normal seawater <sup>a</sup>  | 10,781                                   | 412                                       | 1,283                                     | 399                                     | NA                                                    | 19,352                                   | 67                                       | 0.05                                    | NA                                      | NA                                                     | NA                                                    | 2,712                                                  | NA                                       | 105                                                    | NA                               | NA                               | NA                           |
| Ancient seawater <sup>b</sup> | 8,200                                    | 120                                       | 370                                       | 250                                     | 510                                                   | 18,000                                   | 140                                      | 119                                     | NA                                      | 2.7                                                    | <0.005                                                | <0.5                                                   | NA                                       | 1,100                                                  | <0.1                             | NA                               | NA                           |

Abbreviation: DOC, dissolved organic carbon; NA, not available.

<sup>a</sup>Taken from Millero *et al.* (2008) Deep Sea Res., Part I 55:50–72.

<sup>b</sup>Taken from Katayama *et al.* (2015) ISME J. 9:436–446.

**Table S3.** Stable isotopic signatures of groundwater and natural gas.

| Site code | Groudwater                                   |                                                  |                                   | Natural gas                        | $\alpha_c^a$ |
|-----------|----------------------------------------------|--------------------------------------------------|-----------------------------------|------------------------------------|--------------|
|           | $\delta D$ of H <sub>2</sub> O<br>(‰, VSMOW) | $\delta^{18}O$ of H <sub>2</sub> O<br>(‰, VSMOW) | $\delta^{13}C_{DIC}$<br>(‰, VPDB) | $\delta^{13}C_{CH_4}$<br>(‰, VPDB) |              |
| YHN       | -5.8                                         | -1.6                                             | -8.64                             | -57.2                              | 1.052        |
| LSH       | -12.6                                        | 0.6                                              | 0.14                              | -40.1                              | 1.042        |
| XTU       | -13.0                                        | 0.5                                              | 3.13                              | -40.9                              | 1.046        |
| ARM       | -24.3                                        | -3.3                                             | 3.70                              | -36.6                              | 1.042        |

Abbreviation: DIC, dissolved inorganic carbon; VSMOW, Vienna Standard Mean Ocean Water; VPDB, Vienna Pee Dee Belemnite.

$$^a\alpha_c = (\delta^{13}C_{DIC} + 10^3)/(\delta^{13}C_{CH_4} + 10^3).$$

**Table S4.** Number of prokaryotic 16S rRNA gene sequences derived from groundwater and statistical estimators.

| Site code | Total of sequences | No. of OTUs | Coverage | Chao 1 | Shannon index |
|-----------|--------------------|-------------|----------|--------|---------------|
| YHN       | 41,573             | 504         | 99.5%    | 742    | 4.57          |
| LSH       | 51,920             | 332         | 99.8%    | 571    | 2.97          |
| XTU       | 14,005             | 429         | 99.4%    | 497    | 5.62          |
| ARM       | 23,073             | 196         | 99.8%    | 231    | 3.95          |

Abbreviations: OTU, operational taxonomic unit.

**Table S5.** Archaeal and bacterial 16S rRNA gene sequence derived from the cultures using YPG medium-amended groundwater.

| Site code | OTU             | Accession number | No. of clones | Phylogenetic group        | Closest cultivated species (% identity)            | Predicted metabolism |
|-----------|-----------------|------------------|---------------|---------------------------|----------------------------------------------------|----------------------|
| YHN       | <i>Archaea</i>  |                  |               |                           |                                                    |                      |
|           | YHN_cA01        | LC179580         | 56            | <i>Methanobacteriales</i> | <i>Methanothermobacter defluvii</i> (99)           | HM                   |
|           | Total           |                  | 56            |                           |                                                    |                      |
|           | <i>Bacteria</i> |                  |               |                           |                                                    |                      |
|           | YHN_cB01        | LC179581         | 43            | <i>Bacillales</i>         | <i>Paenibacillus thailandensis</i> (82)            | FE                   |
|           | YHN_cB02        | LC179582         | 7             | <i>Bacillales</i>         | <i>Paenibacillus thailandensis</i> (80)            | FE                   |
|           | YHN_cB03        | LC179583         | 3             | <i>Clostridiales</i>      | <i>Pelotomaculum thermopropionicum</i> (90)        | FE                   |
|           | YHN_cB04        | LC179584         | 2             | <i>Clostridiales</i>      | <i>Desulfotomaculum thermosapovorans</i> (94)      | FE or SR             |
| Total     |                 | 55               |               |                           |                                                    |                      |
| LSH       | <i>Archaea</i>  |                  |               |                           |                                                    |                      |
|           | LSH_cA01        | LC179571         | 53            | <i>Methanobacteriales</i> | <i>Methanothermobacter defluvii</i> (99)           | HM                   |
|           | LSH_cA02        | LC179572         | 2             | <i>Methanobacteriales</i> | <i>Methanobacterium beijingense</i> (96)           | HM                   |
|           | Total           |                  | 55            |                           |                                                    |                      |
|           | <i>Bacteria</i> |                  |               |                           |                                                    |                      |
|           | LSH_cB01        | LC179573         | 31            | <i>Synergistales</i>      | <i>Thermovirga lienii</i> (92)                     | FE                   |
|           | LSH_cB02        | LC179574         | 17            | <i>Limnochordales</i>     | <i>Limnochorda pilosa</i> (99)                     | FE                   |
|           | LSH_cB03        | LC179575         | 6             | <i>Clostridiales</i>      | <i>Tissierella creatinophila</i> (84)              | FE                   |
| Total     |                 | 54               |               |                           |                                                    |                      |
| XTU       | <i>Archaea</i>  |                  |               |                           |                                                    |                      |
|           | XTU_cA01        | LC179576         | 48            | <i>Methanobacteriales</i> | <i>Methanothermobacter defluvii</i> (99)           | HM                   |
|           | Total           |                  | 48            |                           |                                                    |                      |
|           | <i>Bacteria</i> |                  |               |                           |                                                    |                      |
|           | XTU_cB01        | LC179577         | 29            | <i>Clostridiales</i>      | <i>Christensenella minuta</i> (86)                 | FE                   |
|           | XTU_cB02        | LC179578         | 23            | <i>Ignavibacteriales</i>  | <i>Melioribacter roseus</i> (99)                   | FE                   |
|           | XTU_cB03        | LC179579         | 4             | <i>Clostridiales</i>      | <i>Desulfonosporus thiosulfogenes</i> (91)         | FE                   |
| Total     |                 | 56               |               |                           |                                                    |                      |
| ARM       | <i>Archaea</i>  |                  |               |                           |                                                    |                      |
|           | ARM_cA01        | LC179566         | 48            | <i>Methanobacteriales</i> | <i>Methanothermobacter thermautotrophicus</i> (99) | HM                   |
|           | Total           |                  | 48            |                           |                                                    |                      |
|           | <i>Bacteria</i> |                  |               |                           |                                                    |                      |
|           | ARM_cB01        | LC179567         | 39            | <i>Thermotogales</i>      | <i>Thermotoga elfii</i> (94)                       | FE                   |
|           | ARM_cB02        | LC179568         | 7             | <i>Ignavibacteriales</i>  | <i>Ignavibacterium album</i> (97)                  | FE                   |
|           | ARM_cB03        | LC179569         | 4             | <i>Clostridiales</i>      | <i>Tissierella creatinophila</i> (84)              | FE                   |
|           | ARM_cB04        | LC179570         | 1             | <i>Rhodocyclales</i>      | <i>Thauera linaloolentis</i> (95)                  | DE                   |
| Total     |                 | 51               |               |                           |                                                    |                      |

Abbreviation: OTU, operational taxonomic unit; HM, H<sub>2</sub>-utilizing methanogenesis; SR, sulfate-reduction; FE, fermentation; DE, denitrification.

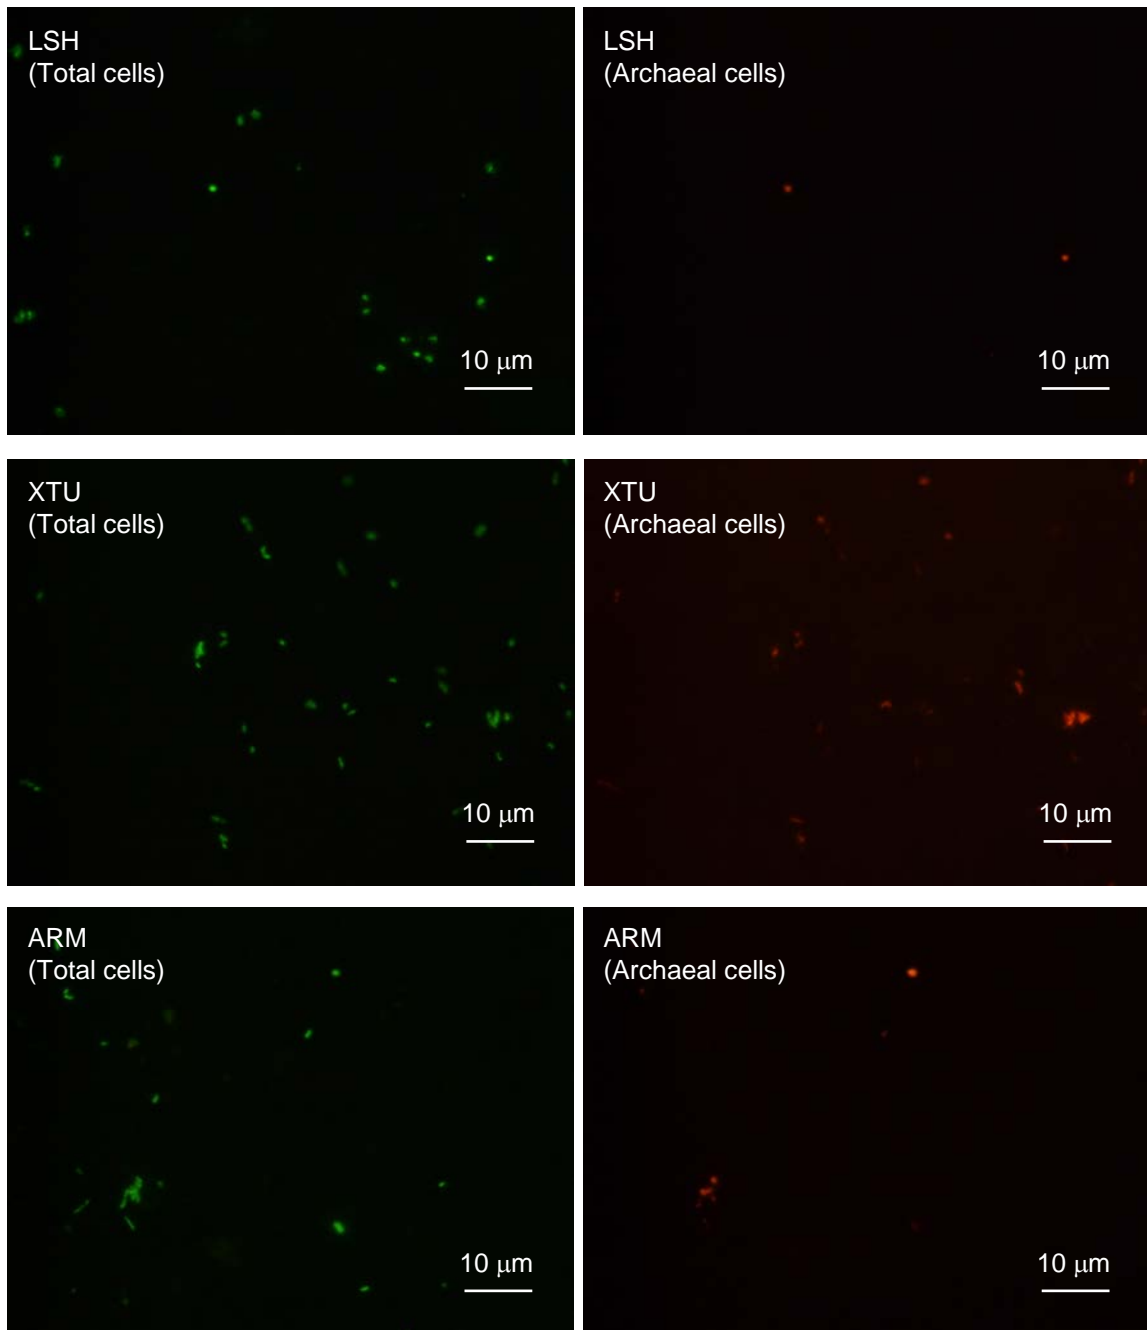

**Fig. S1.** Photomicrographs of FISH-positive archaeal cells in anaerobic groundwater samples. Each double panel shows identical fields and depicts total microbial cells counterstained with SYBR Green I (green) and FISH-positive cells stained with Cy3 (red) hybridized with ARCH915 (specific for the 16S rRNA of domain *Archaea*).

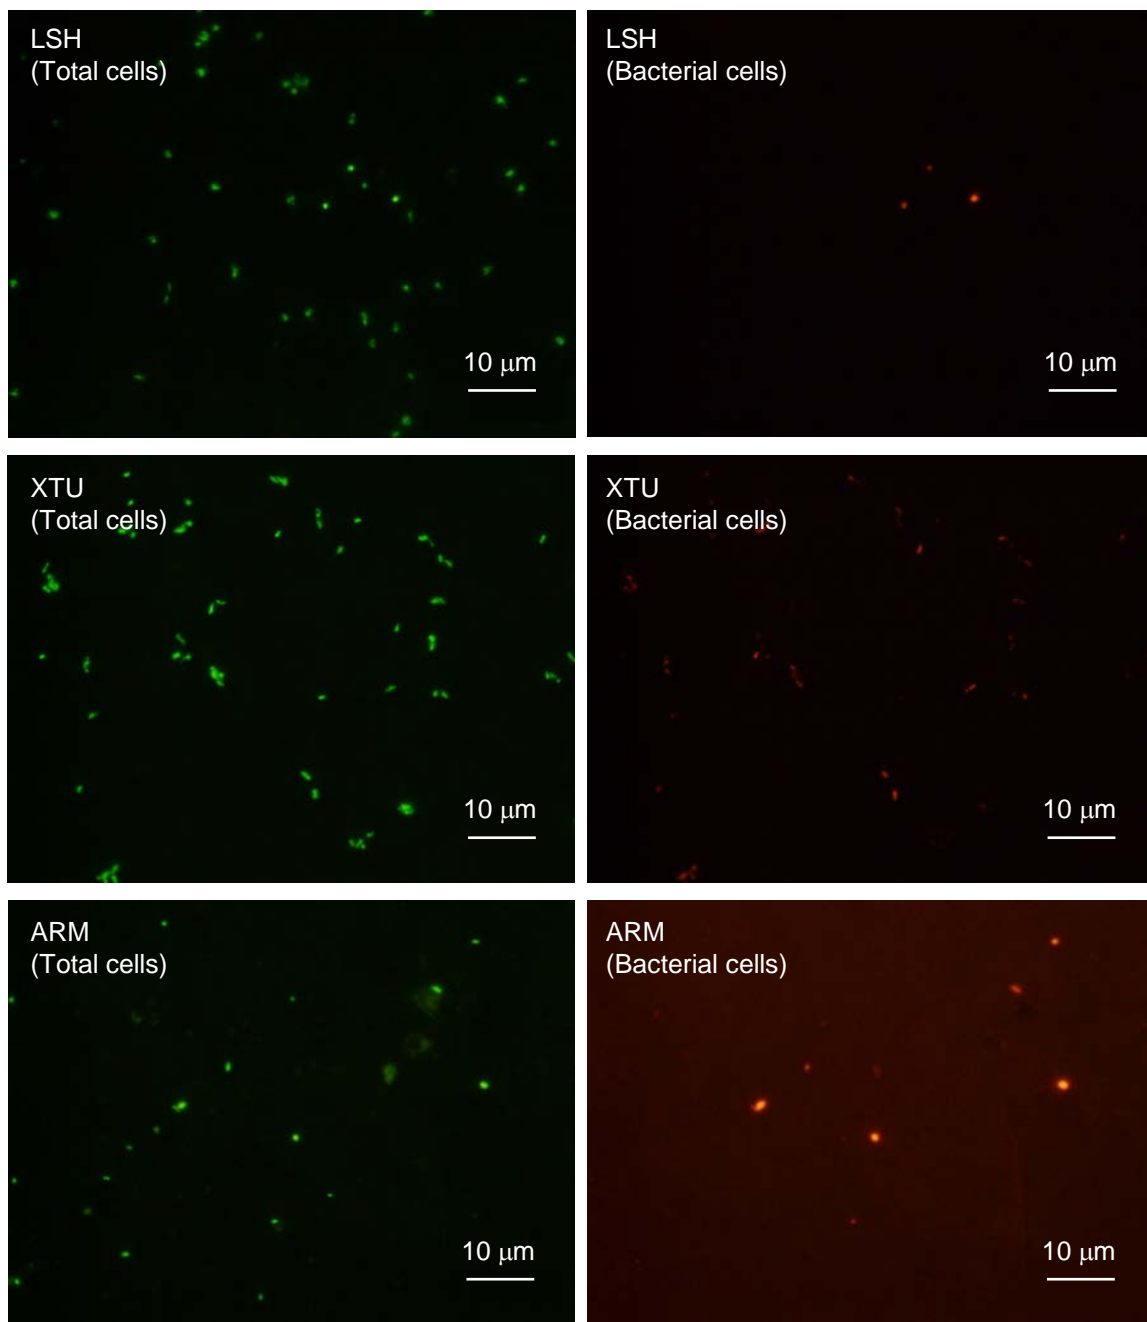

**Fig. S2.** Photomicrographs of FISH-positive bacterial cells in anaerobic groundwater samples. Each double panel shows identical fields and depicts total microbial cells counterstained with SYBR Green I (green) and FISH-positive cells stained with Cy3 (red) hybridized with EUB338 (specific for the 16S rRNA of domain *Bacteria*).

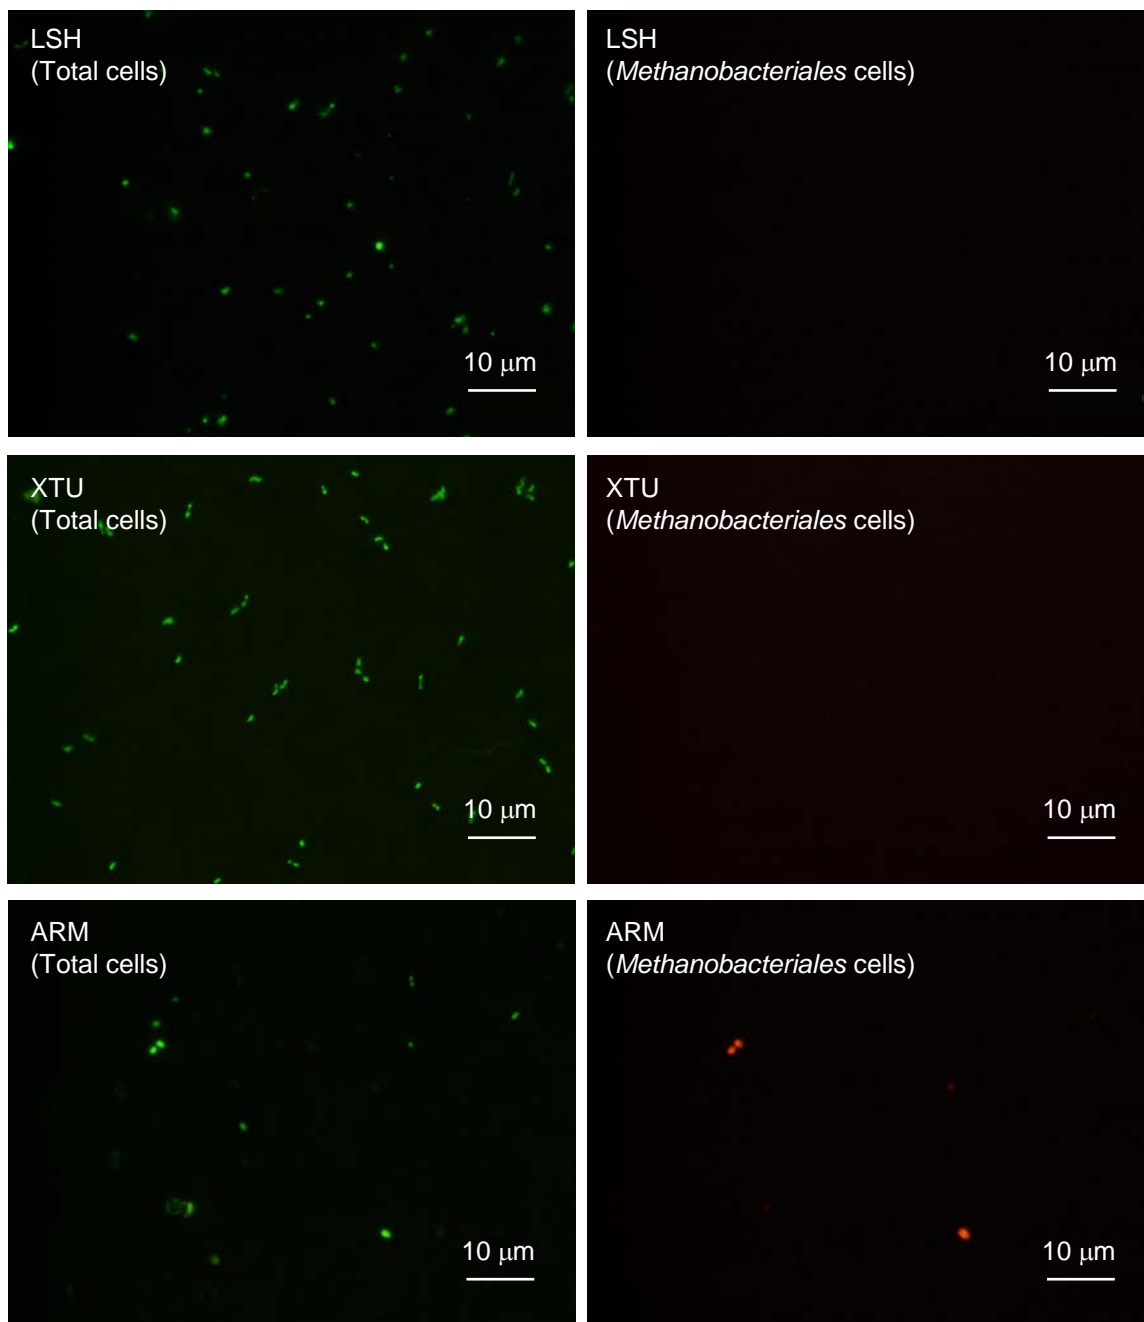

**Fig. S3.** Photomicrographs of FISH-positive *Methanobacteriales* cells in anaerobic groundwater samples. Each double panel shows identical fields and depicts total microbial cells counterstained with SYBR Green I (green) and FISH-positive cells stained with Cy3 (red) hybridized with MB1174 (specific for the 16S rRNA of the archaeal members of the order *Methanobacteriales*).



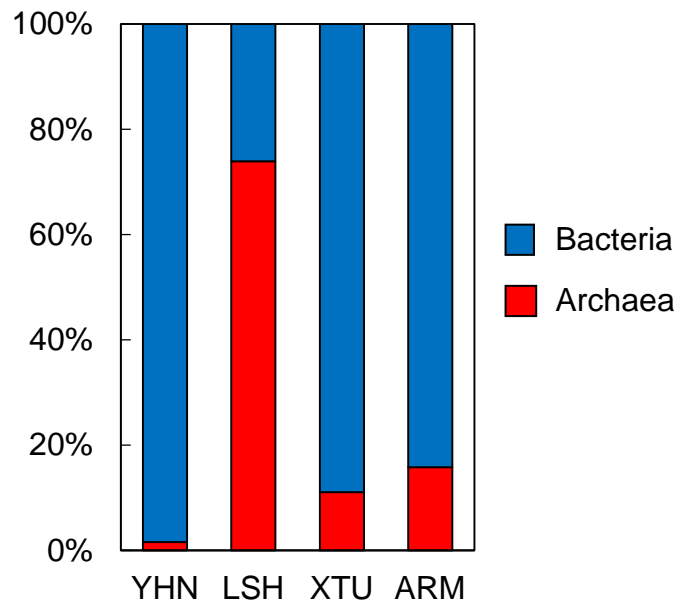

**Fig. S4.** Percent relative abundance of archaeal and bacterial 16S rRNA genes obtained from NGS analysis.

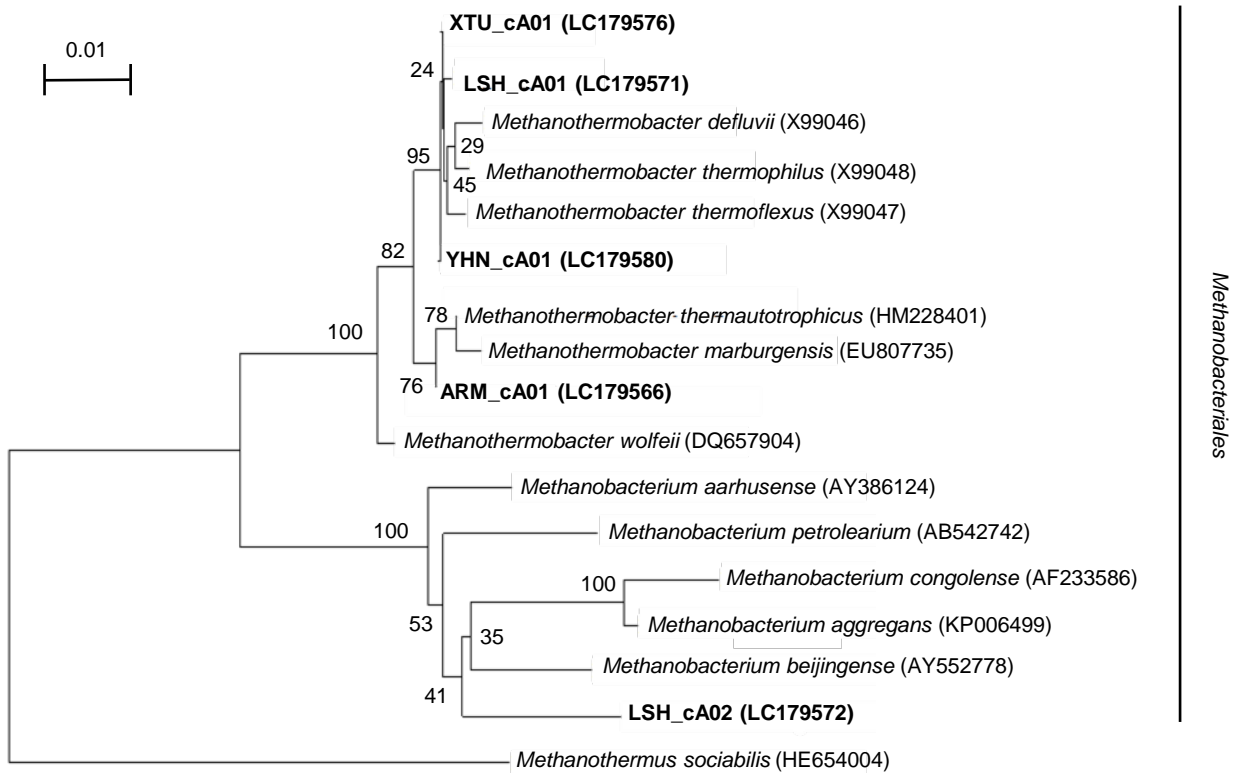

**Fig. S5.** Neighbor-joining tree of archaeal 16S rRNA gene sequences derived from the cultures using YPG medium-amended groundwater. The 5 OTUs obtained in this study are shown with their relatives. Accession numbers are shown in parentheses. Bootstrap values determined from 1,000 iterations are indicated at the branching points. The sequence of *Methanothermus sociabilis* was used as the outgroup to root the tree. The scale bar represents 1 substitution per 100 nucleotides.

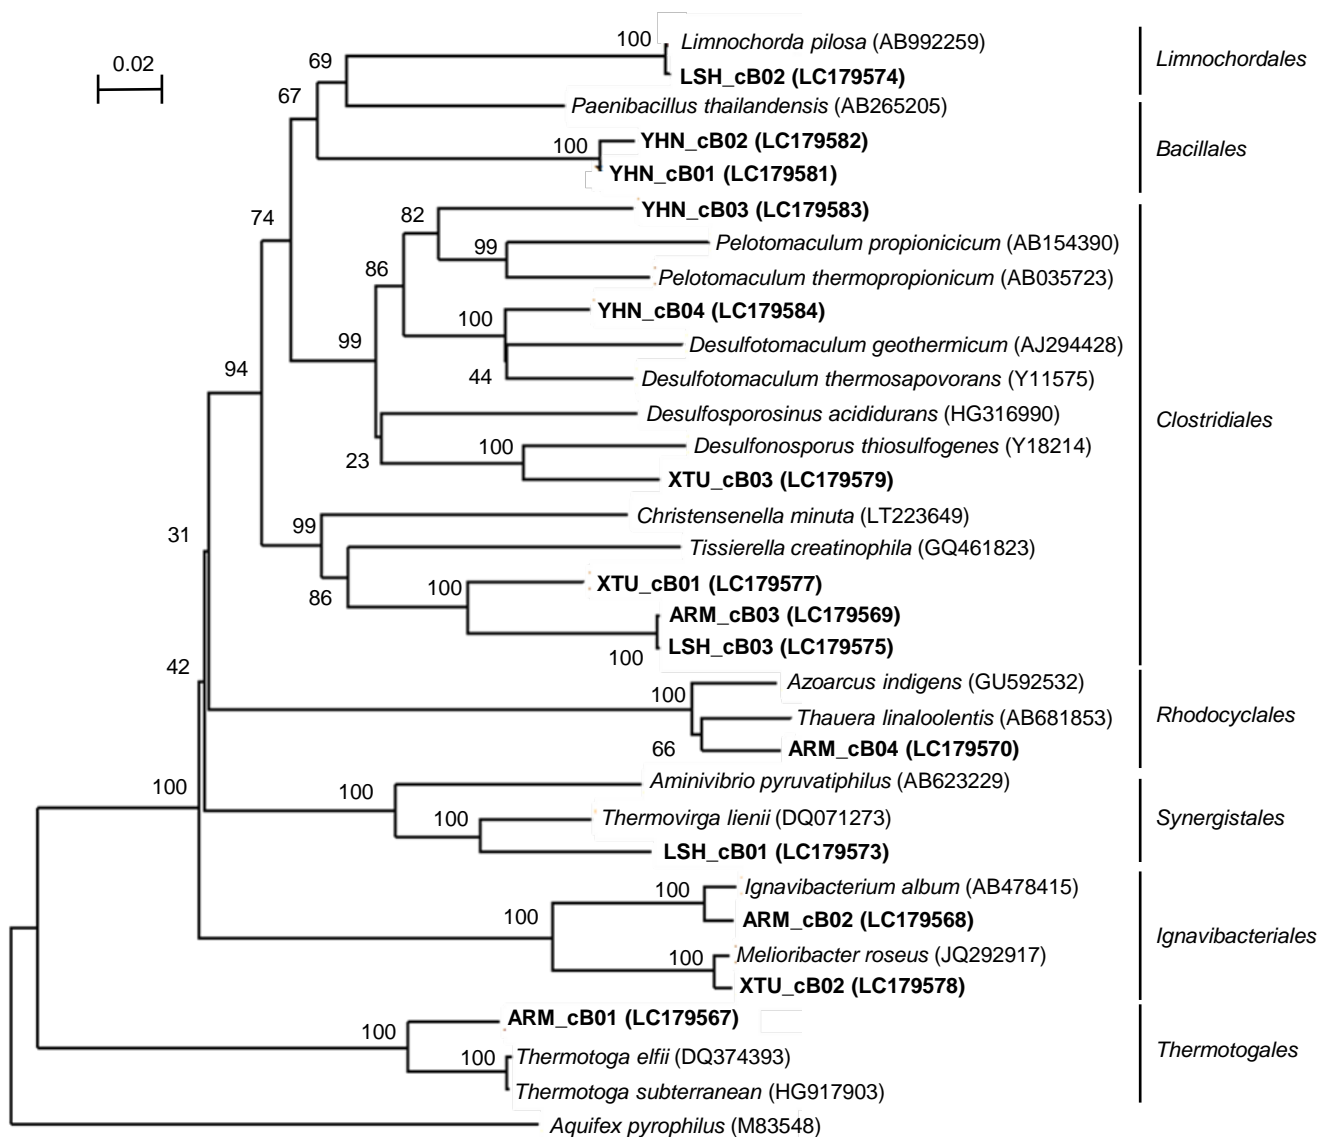

**Fig. S6.** Neighbor-joining tree of bacterial 16S rRNA gene sequences derived from the cultures using YPG medium-amended groundwater. The 14 OTUs obtained in this study are shown with their relatives. Accession numbers are shown in parentheses. Bootstrap values determined from 1,000 iterations are indicated at the branching points. The sequence of *Aquifex pyrophilus* was used as the outgroup to root the tree. The scale bar represents 2 substitutions per 100 nucleotides.
